# Supplementary material for: Effects of a Short Daytime Nap on the Cognitive Performance: A Systematic Review and Meta-Analysis
Source: MDPI journal article supplement (doi:10.3390/ijerph181910212), 2021-09-28
Supplement: s1 [file s1]

**Table S1.** Characteristics of included studies

| Study               | Design     |            |                      | Participants         |             |           |                      |             |           | Nap      | Time between nap and test                 | Test of cognitive performance |                                                                         | Quality of articles                                      |      |          |           |          |
|---------------------|------------|------------|----------------------|----------------------|-------------|-----------|----------------------|-------------|-----------|----------|-------------------------------------------|-------------------------------|-------------------------------------------------------------------------|----------------------------------------------------------|------|----------|-----------|----------|
|                     | Cross-over | Randomized | Environment          | Nap                  |             |           | Control              |             |           |          |                                           | Duration min                  | Time hours                                                              | t1 min                                                   | Name | Function | CONSORT % | STROBE % |
|                     |            |            |                      | n                    | Age mean±SD | Sex % men | n                    | Age mean±SD | Sex % men |          |                                           |                               |                                                                         |                                                          |      |          |           |          |
| Abdessalem 2019     | no         | yes        | Laboratory           | -                    | 21±3        | -         | -                    | 21±3        | -         | 25       | 13:00-13:25<br>14:00-14:25<br>15:00-15:25 | 80<br>140<br>200              | Digit cancellation task                                                 | Alertness                                                | -    | 53.1     |           |          |
| Amin 2012           | no         | no         | Real work Laboratory | 18                   | 29±1.9      | 61        | 11                   | 30±1.4      | 55        | 20       | 13:15-13:35                               | 25                            | EEG recording<br>CPT II                                                 | Alertness<br>Cognitive performance<br>Alertness          | -    | 50       |           |          |
| Asaoka 2010         | yes        | no         | Laboratory           | 8                    | 24±1.1      | 75        | 8                    | 24±1.1      | 75        | 60       | 14:00-15:00                               | 1,5                           | AOT                                                                     | Alertness<br>Cognitive performance                       | -    | 46.9     |           |          |
| Bauckhaus 2006      | no         | yes        | Laboratory           | 17                   | 20.3±0.4    | -         | 17                   | 20.3±0.4    | -         | 60       | 14:45-15:45                               | 15                            | PAL<br>MTT<br>TAP<br>DSB                                                | Memory<br>Cognitive performance<br>Alertness<br>Memory   | 40   | -        |           |          |
| Backhaus 2016       | no         | yes        | Laboratory           | 2 groups : 22 and 20 | 70.4±6.1    | 45.2      | 21                   | 73.9±4.5    | 14.3      | 45 or 90 | 12:50-13:35<br>12:50-14:20                | 35, and 60<br>80, and 105     | VLMT<br>MAT                                                             | Memory                                                   | 45.7 | -        |           |          |
| Christy 2015        | no         | no         | Laboratory           | -                    | -           | -         | -                    | -           | -         | 60       | -                                         | -                             | SUPA<br>ROCFT<br>Maze learning task                                     | Memory<br>Cognitive performance<br>Cognitive performance | -    | 50       |           |          |
| Debarnot 2011       | no         | yes        | Laboratory           | 2 groups : 11 and 10 | 26±4.4      | -         | 2 groups : 6 and 8   | 26±4.4      | -         | 20 or 90 | 14:00-14:20<br>14:00-15:30                | 30<br>100                     | Sequential finger-tapping task                                          | Memory                                                   | 31.4 | -        |           |          |
| Hayashi 1999        | yes        | no         | Laboratory           | 7                    | 20.6        | 43        | 7                    | 20.6        | 43        | 20       | 14:00-14:20                               | 40, 100, and 160              | Logical reasoning<br>Addition<br>Visual detection<br>Auditory vigilance | Cognitive performance                                    | -    | 37.5     |           |          |
| Hayashi 1999        | yes        | no         | Laboratory           | 10                   | 20.7        | -         | 10                   | 20.7        | -         | 20       | 12:20-12:40                               | 20, 80, 140, 200, and 260     | Logical reasoning<br>Addition<br>Visual detection<br>Auditory vigilance | Cognitive performance                                    | -    | 50       |           |          |
| Lahl 2008           | yes        | no         | Laboratory           | 2 groups : 25 and 14 | 24.4        | -         | 2 groups : 25 and 14 | 24.4        | -         | 6 or 50  | 13:30-13:36<br>13:30-14:20                | 10<br>54                      | Memory task                                                             | Memory                                                   | -    | 37.5     |           |          |
| Lau 2010            | no         | yes        | Laboratory           | 14                   | 21.2±1.1    | 50        | 17                   | 21.21±1.1   | 41        | 90       | 13:00-14:30                               | 125                           | Direct associative memory                                               | Memory                                                   | 40   | -        |           |          |
| Lau 2011            | no         | no         | Laboratory           | 2 groups : 15 and 11 | 18.98       | 30.8      | 2 groups : 14 and 11 | 18.98       | 32        | 90       | 12:00-13:30                               | 30                            | Cued recall task<br>Multiple-choice task<br>Radical task                | Memory                                                   | -    | 34.4     |           |          |
| Milner 2006         | no         | yes        | Laboratory           | 18                   | 20.2±2.27   | -         | 17                   | 20.2±2.27   | -         | 20       | 14:40-15:00                               | 30<br>50                      | Ball and cup test<br>Auditory oddball task                              | Alertness                                                | 57.1 | -        |           |          |
| Takahashi 2004      | yes        | no         | Laboratory           | 8                    | 49          | -         | 8                    | 49          | -         | 15       | 12:30-12:45                               | 30, 135 and 135               | Choice reaction time<br>Alertness scale                                 | Alertness                                                | -    | 40.6     |           |          |
| Tucker 2006         | no         | no         | Laboratory           | 12                   | 20.1        | 50        | 17                   | 20.1        | 41        | 60       | 13:00-14:00                               | 240                           | Paired associates task<br>MTT<br>DSB                                    | Memory<br>Cognitive performance<br>Memory                | -    | 34.4     |           |          |
| Tucker 2008         | no         | no         | Laboratory           | 16                   | 23.3        | -         | 17                   | 23.3        | -         | 60       | 13:00-14:00                               | 125                           | SUPA<br>Maze learning task                                              | Memory<br>Cognitive performance                          | -    | 37.5     |           |          |
| Van Schalkwijk 2017 | no         | yes        | Laboratory           | 2 groups : 18 and 17 | 23.3±2.4    | 52.6      | 2 groups : 22 and 19 | 23.3±2.4    | 52.6      | 90       | 14:00-15:30                               | 65                            | WPT<br>MTT                                                              | Memory<br>Cognitive performance                          | 42.9 | -        |           |          |

AOT, Arrow orientation task; CPT II, Conner's Continuous Performance Test Version 5; DSB, Digit span backwards task; EEG, Electroencephalographic; MAT, Motor adaptation task; MTT, Mirror Tracing Task; PAL, Paired associates learning; ROCFT, Rey–Osterrieth complex figure test; SUPA, Semantically unrelated paired associates; TAP, Test of Attentional Performance; VLMT, Verbal learning and memory test; WPT, Word-pair task. **Studies in bold:** studies included in meta-analysis.
